# Supplementary material for: Long-term outcomes of childhood sexual abuse: an umbrella review
Source: PubMed Central journal article supplement (PMC7015702; doi:10.1016/s2215-0366(19)30286-x), 2019-09-10
Supplement: EMS85713-supplement-Appendix.pdf [file EMS85713-supplement-Appendix.pdf]

## Appendix: Supplemental Figures and Tables

**Table S1:** Search terms used in targeted DALY searches

| <b>DALY</b>                           | <b>Search Terms</b>                                                        |
|---------------------------------------|----------------------------------------------------------------------------|
| Ischaemic heart disease               | Ischaemic heart disease, coronary artery disease, coronary heart disease   |
| Lower respiratory infections          | Lower respiratory infection, pneumonia, lung abscess, acute bronchitis     |
| Stroke                                | Stroke, transient ischaemic attack                                         |
| Diarrhoeal diseases                   | Diarrhoeal disease, diarrhoea, dysentery, cholera                          |
| Chronic obstructive pulmonary disease | Chronic obstructive pulmonary disease, COPD, chronic bronchitis, emphysema |
| HIV/AIDS                              | HIV, AIDS, human immunodeficiency virus                                    |
| Road injury                           | Road injury, traffic injury, road injuries, traffic injuries               |
| Alcohol use disorder                  | Alcohol use, alcoholism, alcoholic                                         |
| Schizophrenia                         | Schizophrenia, schizophrenic                                               |
| Bipolar disorder                      | bipolar disorder, manic depression, mania                                  |
| Dysthymia                             | Dysthymia, dysthymic disorder, mild depression, chronic depression         |
| Autism or Asperger's syndrome         | Autism, autistic, Asperger, ASD                                            |
| ADHD and conduct disorder             | Attention deficit hyperactivity disorder, ADHD, conduct disorder           |

**Table S2:** Outcomes excluded from this umbrella review by reason for exclusion

| <b>Non-behavioural psychosocial outcomes</b> | <b>Behavioural outcomes with fewer primary studies than the ten selected</b> | <b>Health outcomes that are sub-categories of other diagnoses<sup>a</sup></b> | <b>Health outcomes that are not diagnoses or symptoms associated with included diagnoses</b> |
|----------------------------------------------|------------------------------------------------------------------------------|-------------------------------------------------------------------------------|----------------------------------------------------------------------------------------------|
| Alcohol problems                             | Anal intercourse                                                             | Depression and/or anxiety                                                     | Cardiopulmonary symptoms                                                                     |
| Anger                                        | Online offending compared with normative groups                              | Dysthymia                                                                     | Dissociation                                                                                 |
| Combined hippocampal volume                  | Offline offending compared with normative groups                             | Generalized anxiety disorder                                                  | Dysmenorrhea                                                                                 |
| Hostility                                    | Online sexual offending compared with offline sexual offending               | Panic disorder                                                                | Dyspareunia                                                                                  |
| Interpersonal problems                       | Paedophilic versus non-paedophilic sexual offending against children         | Paranoia                                                                      | Gastrointestinal symptoms                                                                    |
| Interpersonal sensitivity                    | Suicide                                                                      | Phobia                                                                        | General health                                                                               |
| Left hippocampal volume                      |                                                                              | Social phobia                                                                 | General sequelae                                                                             |
| Locus of control                             |                                                                              | Specific phobia                                                               | Index of general symptoms                                                                    |
| Overall adjustment                           |                                                                              |                                                                               | Non-cyclical chronic pelvic pain                                                             |
| Right hippocampal volume                     |                                                                              |                                                                               | Non-epileptic seizures                                                                       |
| Self-concept impairment                      |                                                                              |                                                                               | Obsessive-compulsive symptomatology                                                          |
| Self-esteem                                  |                                                                              |                                                                               | Obsessions and compulsions                                                                   |

|                   |  |  |                          |
|-------------------|--|--|--------------------------|
| Sexual adjustment |  |  | Psychological correlates |
| Sexual problems   |  |  | Psychological symptoms   |
| Social adjustment |  |  | Psychotic symptoms       |

Note: <sup>a</sup>Outcomes that are a subcategory of a major diagnosis were excluded.

**Table S3:** Data extracted from all meta-analyses by category of data

| <b>General information</b>     | <b>Eligibility criteria</b>                                              | <b>Methodology</b>                                                   | <b>Study results</b>                            |
|--------------------------------|--------------------------------------------------------------------------|----------------------------------------------------------------------|-------------------------------------------------|
| First author                   | Meta-analysis                                                            | Outcomes studied                                                     | Number of participants with exposure            |
| Running title                  | Systematic review                                                        | Whether inclusion criteria are stated                                | Number of participants without exposure         |
| Journal of publication         | Childhood sexual abuse disaggregated from other abuse                    | Number of studies                                                    | Number of participants with outcome             |
| Year of publication            | Average participant age at time of abuse < 18                            | Number of participants                                               | Number of participants without outcome          |
| Date that coding was completed | Average participant age at time of assessment > 18                       | Mean age of participants                                             | Summary statistics reported                     |
|                                | Provides aggregated effect size data for health or psychosocial outcomes | Percentage of participants who are female                            | Summary statistic confidence intervals          |
|                                |                                                                          | Percentage of participants from clinical samples                     | Number of participants in largest primary study |
|                                |                                                                          | Percentage of participants from general population                   | Effect size of largest primary study            |
|                                |                                                                          | Number of databases used                                             | Confidence interval of largest primary study    |
|                                |                                                                          | Number of countries                                                  | Heterogeneity statistic                         |
|                                |                                                                          | Year range of review                                                 |                                                 |
|                                |                                                                          | Study design (prospective, retrospective, cross-sectional, or mixed) |                                                 |
|                                |                                                                          | Quality assessment procedures used                                   |                                                 |

**Table S4:** AMSTAR checklist results and scores\*

| Study         | Outcome(s)                                                                                            | Q1  | Q2  | Q3  | Q4  | Q5  | Q6  | Q7  | Q8  | Q9  | Q10 | Q11 | Aggregate Score |
|---------------|-------------------------------------------------------------------------------------------------------|-----|-----|-----|-----|-----|-----|-----|-----|-----|-----|-----|-----------------|
| Amado, 2015   | Anxiety, anxiety symptoms, depressive symptoms                                                        | -   | -   | -   | -   | Yes | Yes | -   | -   | -   | -   | Yes | 3               |
| Arriola, 2005 | Adult sexual revictimisation, sex trading, sex with multiple partners, unprotected sexual intercourse | -   | Yes | Yes | -   | Yes | Yes | -   | -   | Yes | -   | -   | 5               |
| Chen, 2010    | Posttraumatic stress disorder, schizophrenia, sleep disorders, somatoform disorders                   | Yes | Yes | -   | Yes | Yes | -   | Yes | Yes | Yes | Yes | Yes | 9               |
| Danese, 2014  | Obesity                                                                                               | Yes | -   | -   | -   | Yes | Yes | Yes | Yes | Yes | Yes | Yes | 8               |
| Fossati, 1999 | Borderline personality disorder                                                                       | -   | -   | -   | -   | Yes | -   | -   | -   | Yes | -   | -   | 2               |
| Halpern, 2018 | Substance misuse                                                                                      | Yes | Yes | Yes | -   | -   | Yes | Yes | Yes | Yes | Yes | -   | 8               |
| Hauser, 2011  | Fibromyalgia syndrome                                                                                 | Yes | Yes |     |     | Yes | Yes | Yes | Yes | Yes | Yes | Yes | 9               |
| Irish, 2010   | Pain (continuous), pain (categorical)                                                                 | -   | -   | -   | Yes | Yes | Yes | -   | -   | -   | -   | Yes | 4               |

|                      |                                                                                               |     |     |     |     |     |     |     |     |     |     |     |    |
|----------------------|-----------------------------------------------------------------------------------------------|-----|-----|-----|-----|-----|-----|-----|-----|-----|-----|-----|----|
| Jespersen, 2009      | Sexual offending against children versus adults, sexual offending versus non-sexual offending | -   | -   | Yes | Yes | Yes | Yes | -   | -   | Yes | Yes | Yes | 7  |
| Klonsky, 2009        | Non-suicidal self-injury                                                                      | -   | -   | Yes | -   | Yes | Yes | -   | -   | Yes | Yes | Yes | 6  |
| Lloyd, 2012          | HIV                                                                                           | -   | Yes | Yes | Yes | Yes | Yes | Yes | Yes | Yes | -   | -   | 8  |
| Ludwig, 2018         | Conversion disorder                                                                           | Yes | Yes | Yes | -   | Yes | -   | Yes | Yes | Yes | Yes | -   | 8  |
| Molendijk, 2017      | Eating disorders                                                                              | Yes | Yes | Yes | -   | -   | Yes | Yes | Yes | Yes | Yes | -   | 9  |
| Nelson, 2016         | Depression                                                                                    | Yes | Yes | Yes | -   | -   | -   | -   | -   | Yes | Yes | -   | 5  |
| Neumann, 1996        | Post-traumatic stress responses                                                               | -   | -   | -   | -   | Yes | -   | -   | -   | Yes | -   | -   | 2  |
| Ng, 2018             | Suicide attempts                                                                              | Yes | -   | Yes | -   | -   | Yes | -   | -   | Yes | Yes | -   | 5  |
| Quinones-Munoz, 2001 | Psychological symptoms                                                                        | -   | -   | -   | Yes | Yes | Yes | -   | -   | Yes | -   | -   | 4  |
| Ulrich, 2005         | Somatization                                                                                  | -   | -   | Yes | Yes | Yes | -   | -   | -   | Yes | -   | -   | 4  |
| Varese, 2012         | Psychosis                                                                                     | Yes | Yes | Yes | Yes | Yes | Yes | Yes | Yes | Yes | Yes | Yes | 11 |

*Note.* Q= Question. \*See <http://amstar.ca/docs/AMSTARguideline.pdf> for a list of the AMSTAR questions. The criteria for question 5 (Was a list of studies included and excluded provided?) and 11 (Was the conflict of interest included?) were modified to reflect the included studies. For question 5, only a list of included, not excluded, studies were required, and for question 11, funding and support documentation was required only for the meta-analyses, not for each component primary study. One study included in this umbrella review<sup>50</sup> was a replication of a prior meta-analysis<sup>93</sup> and therefore did not conduct original literature searches or data extraction. For this reason, the original meta-analysis, which was not otherwise included in the analysis of this umbrella review, was coded to supply data for questions 1, 2, 3, and 4 of the AMSTAR checklist.

**Table S5:** Quality analyses for meta-analyses of long-term health outcomes following childhood sexual abuse

| <b>Outcome</b>                               | <b>Prediction interval excludes null value</b> | <b>Heterogeneity</b> | <b>Evidence of excess statistical significance</b> | <b>Evidence of small study effects</b> | <b>AMSTAR</b> | <b>Overall score</b> |
|----------------------------------------------|------------------------------------------------|----------------------|----------------------------------------------------|----------------------------------------|---------------|----------------------|
| Adult sexual revictimisation                 | -                                              | High                 | Yes                                                | -                                      | Low           | 0                    |
| Anxiety                                      | -                                              | -                    | No                                                 | -                                      | Low           | 1                    |
| Anxiety symptoms                             | -                                              | -                    | Yes                                                | -                                      | Low           | 0                    |
| Borderline personality disorder              | -                                              | Low                  | -                                                  | -                                      | Low           | 1                    |
| Conversion disorder                          | -                                              | Low                  | -                                                  | No                                     | High          | 3                    |
| Depression                                   | -                                              | High                 | No                                                 | No                                     | Low           | 2                    |
| Depressive symptoms                          | -                                              | -                    | Yes                                                | -                                      | Low           | 0                    |
| Eating disorders                             | -                                              | High                 | -                                                  | No                                     | High          | 2                    |
| Fibromyalgia                                 | No                                             | Low                  | Yes                                                | No                                     | High          | 3                    |
| HIV                                          | No                                             | High                 | Yes                                                | -                                      | High          | 1                    |
| Non-suicidal self-injury                     | -                                              | High                 | Yes                                                | Yes                                    | High          | 1                    |
| Obesity                                      | -                                              | High                 | Yes                                                | Yes                                    | High          | 1                    |
| Pain (continuous)                            | -                                              | -                    | No                                                 | -                                      | Low           | 1                    |
| Pain (categorical)                           | -                                              | -                    | Yes                                                | -                                      | Low           | 0                    |
| Posttraumatic stress disorder                | Yes                                            | Low                  | No                                                 | No                                     | High          | 5                    |
| Psychological symptoms                       | No                                             | High                 | Yes                                                | -                                      | Low           | 0                    |
| Psychosis                                    | -                                              | Low                  | Yes                                                | No                                     | High          | 3                    |
| Schizophrenia                                | No                                             | Low                  | No                                                 | No                                     | High          | 4                    |
| Sexual offending against children vs. adults | No                                             | High                 | Yes                                                | -                                      | High          | 1                    |
| Sexual offending vs.                         | Yes                                            | High                 | No                                                 | No                                     | High          | 3                    |

|                                       |     |      |     |     |      |   |
|---------------------------------------|-----|------|-----|-----|------|---|
| non-sexual<br>offending               |     |      |     |     |      |   |
| Sex trading                           | -   | High | No  | -   | Low  | 1 |
| Sex with<br>multiple<br>partners      | -   | High | Yes | -   | Low  | 0 |
| Somatization                          | -   | Low  | -   | -   | Low  | 1 |
| Somatoform<br>disorders               | No  | Low  | Yes | No  | High | 3 |
| Substance<br>misuse                   | Yes | Low  | No  | No  | High | 5 |
| Suicide<br>attempts                   | Yes | High | No  | Yes | Low  | 2 |
| Post-traumatic<br>stress<br>responses | -   | -    | -   | -   | Low  | 0 |
| Unprotected<br>sexual<br>intercourse  | -   | High | No  | -   | Low  | 1 |



## Prediction Intervals

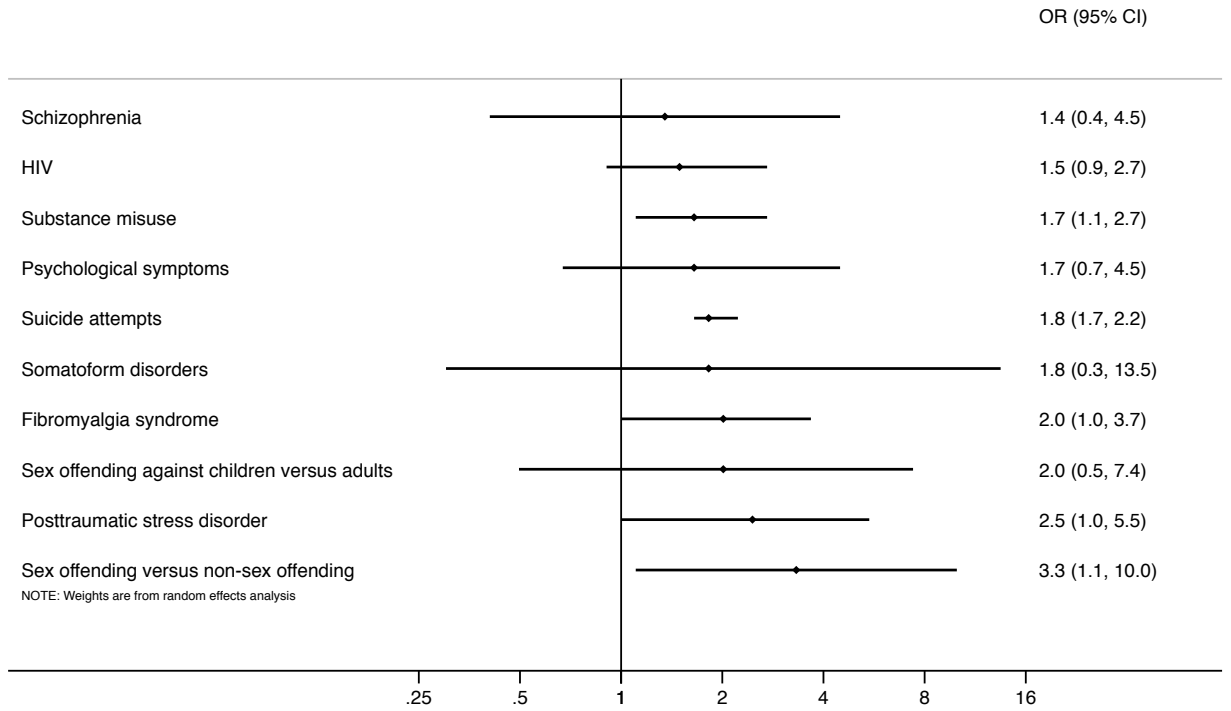

**Figure S1:** 95% prediction intervals for odds ratios [ORs] of long-term health outcomes following childhood sexual abuse

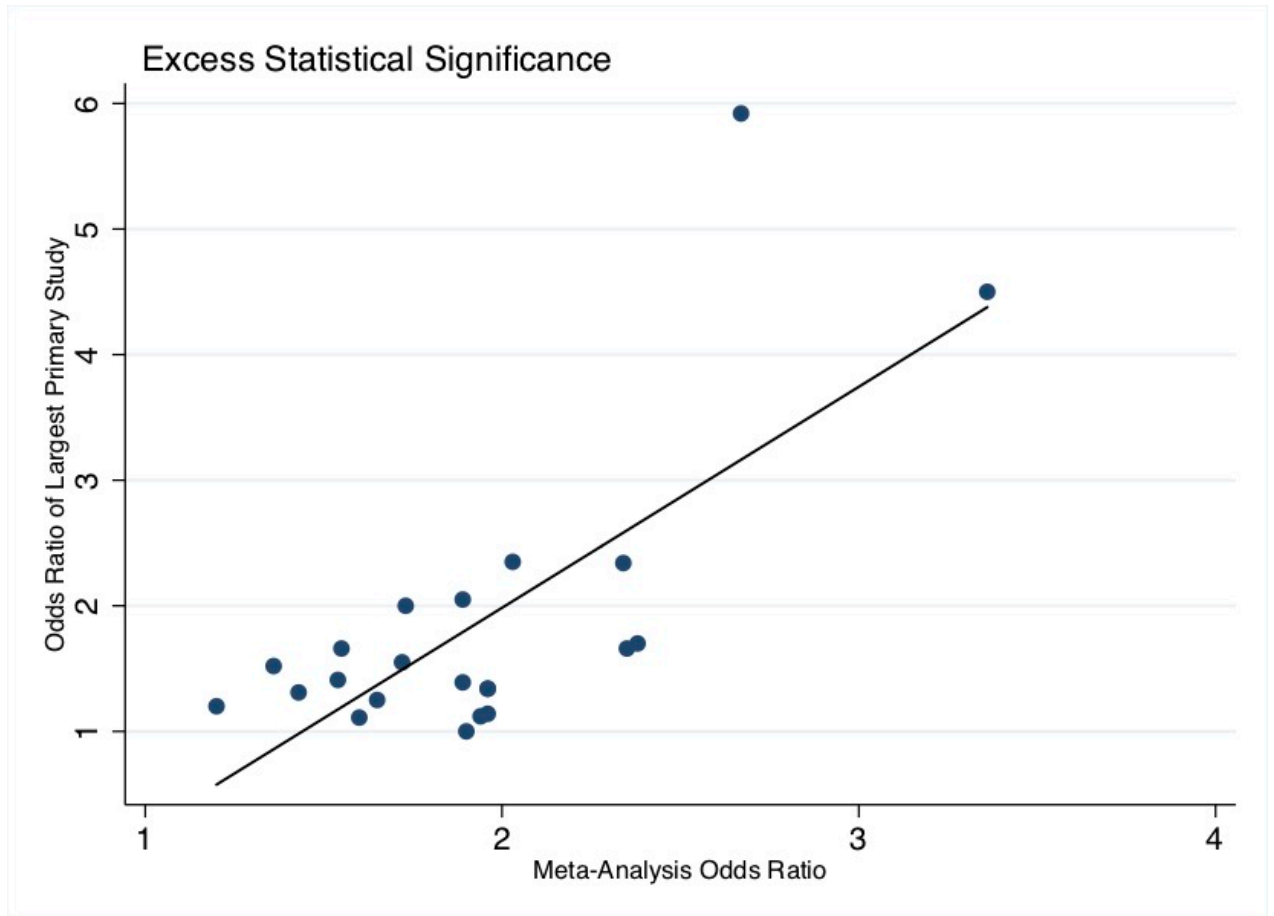

**Figure S2:** Odds ratios reported in the meta-analysis compared with largest primary study to test excess statistical significance

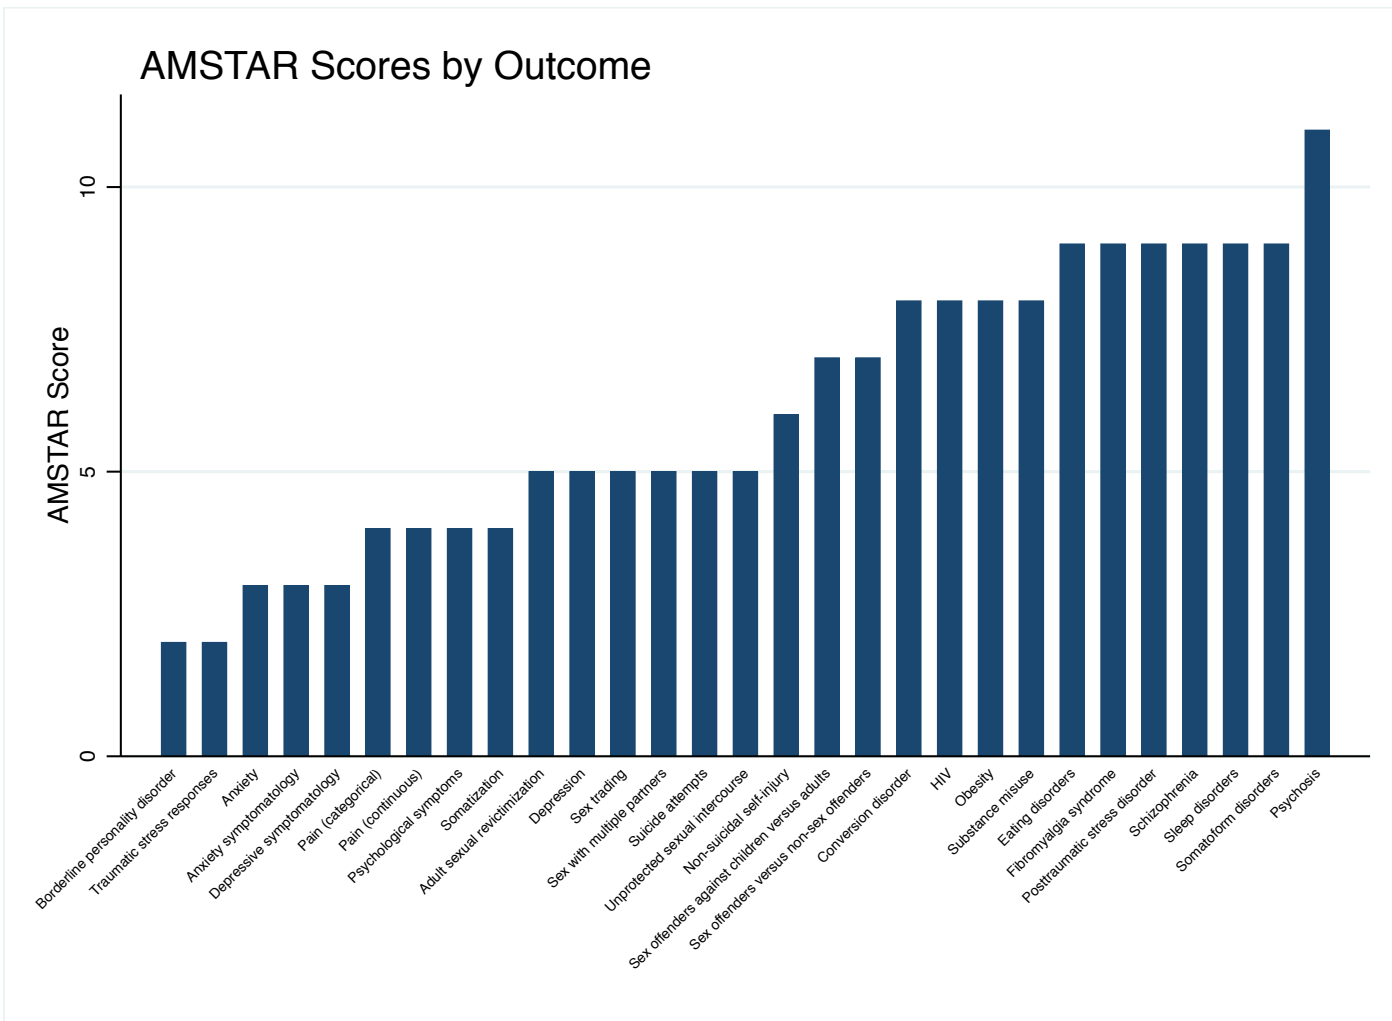

**Figure S3:** AMSTAR scores by long-term health outcome
